# Supplementary material
Source: publisher figshare collection journal article supplement (https://karger.figshare.com/articles/dataset/_/4249931)
Supplement: Supplementary file 1 [file 1]

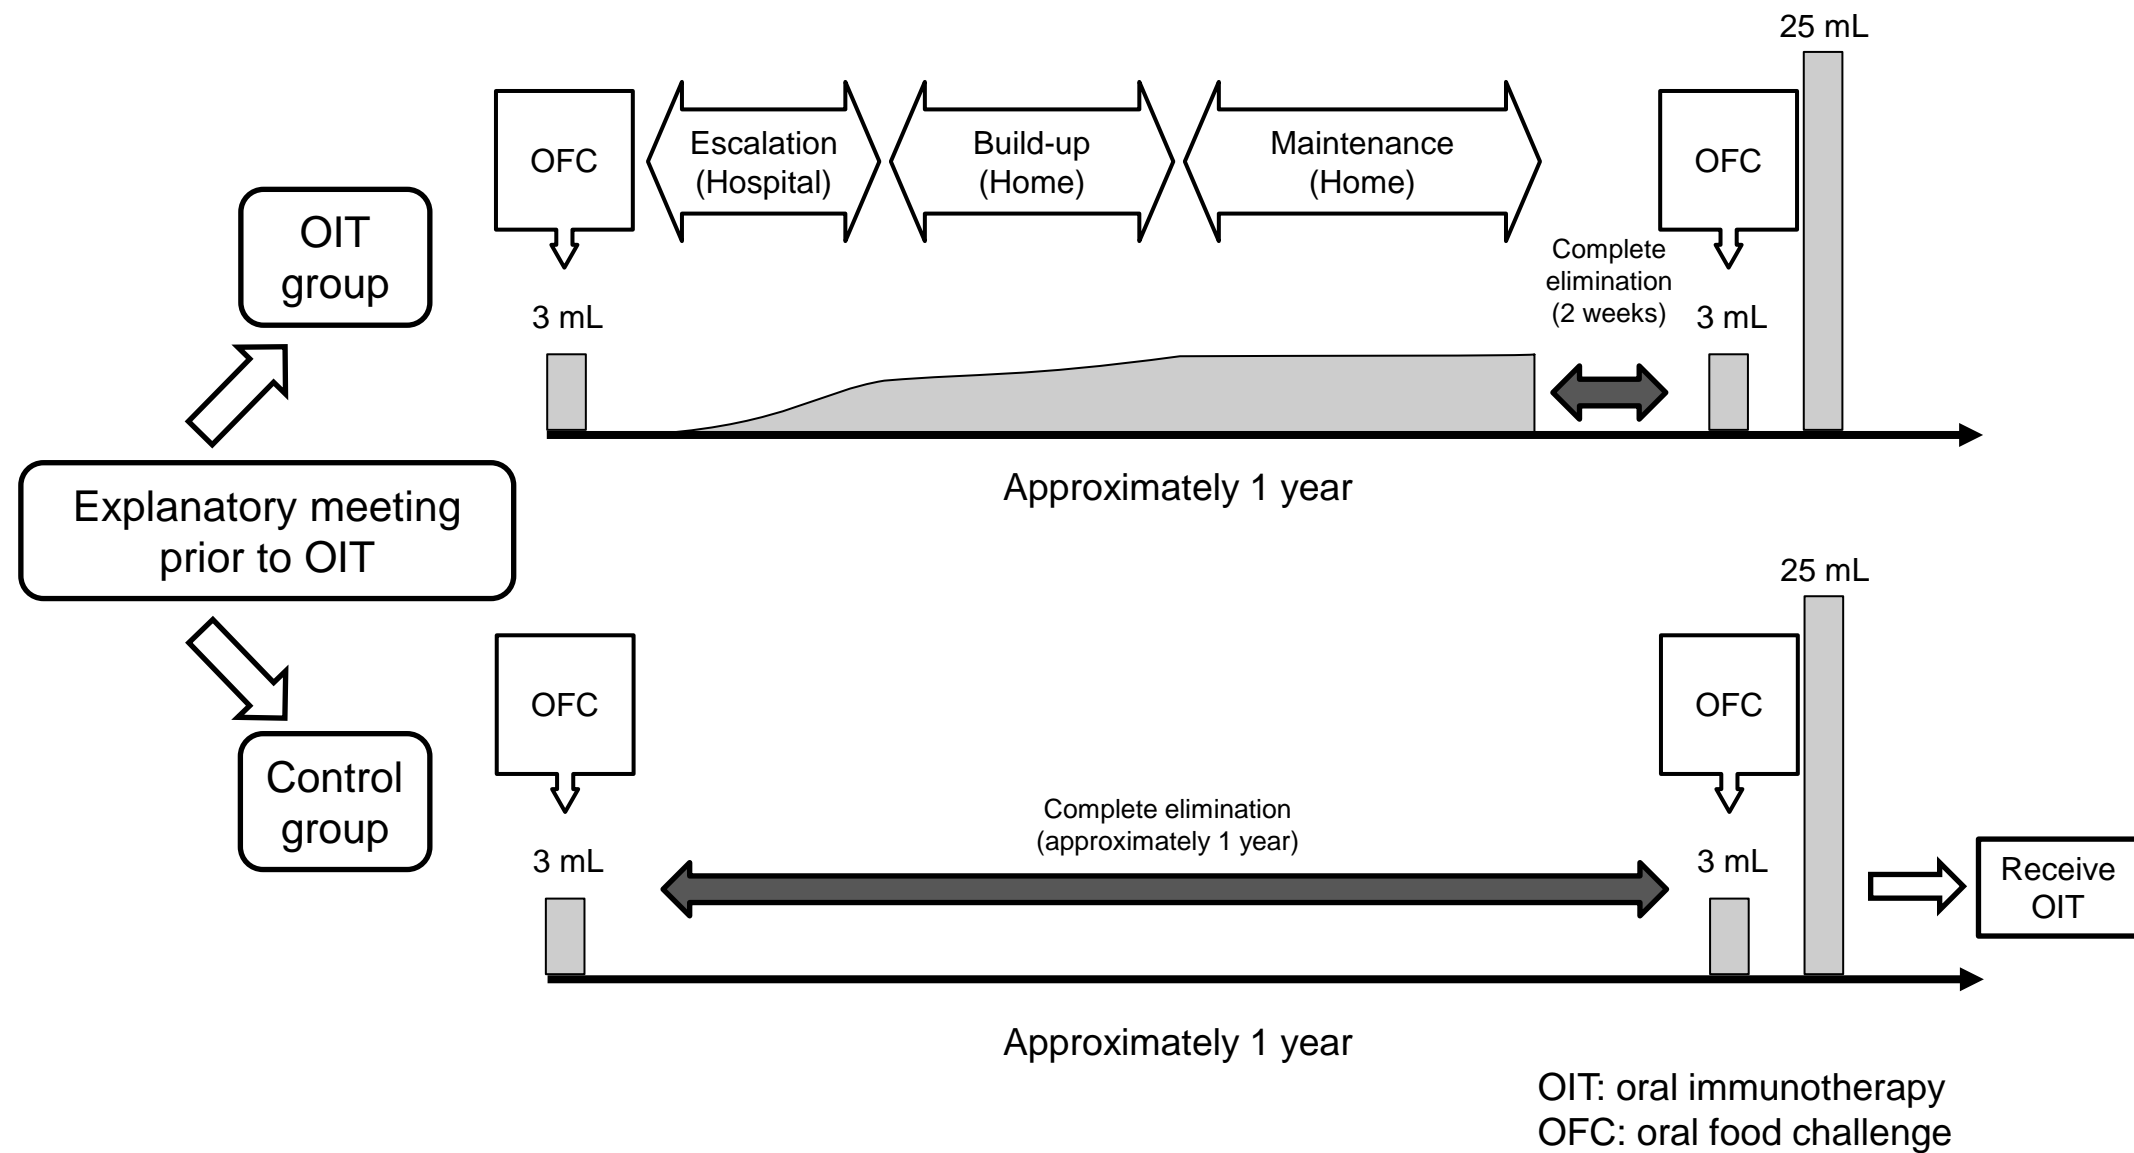

**Supplementary Figure 1.** Overview of the study. Patients are assigned to OIT group and Control group. After approximately 1 year, OFCs were implemented for both groups.
